# Supplementary material for: Bottom-Up Synthesis of De-Functionalized and Dispersible Carbon Spheres as Colloidal Adsorbent
Source: MDPI journal article supplement (doi:10.3390/ijms24043831), 2023-02-14
Supplement: s1 [file s1]

# Bottom-up synthesis of de-functionalized and dispersible carbon spheres as colloidal adsorbent

Maria Balda <sup>1</sup>, Katrin Mackenzie <sup>1</sup>, Silke Wosidlo <sup>1</sup>, Hans Uhlig <sup>2</sup>, Jens Möllmer <sup>2</sup>, Frank-Dieter Kopinke <sup>1</sup>, Gerrit Schüürmann <sup>3,4</sup> and Anett Georgi <sup>1,\*</sup>

<sup>1</sup> Department of Environmental Engineering, Helmholtz Centre for Environmental Research – UFZ, 04318 Leipzig, Germany

<sup>2</sup> Institut für Nichtklassische Chemie e.V. – INC, 04318 Leipzig, Germany

<sup>3</sup> Institute of Organic Chemistry, Technical University Bergakademie Freiberg, 09599 Freiberg, Germany

<sup>4</sup> Department of Ecological Chemistry, Helmholtz Centre for Environmental Research – UFZ, 04318 Leipzig, Germany

\* Correspondence: anett.georgi@ufz.de

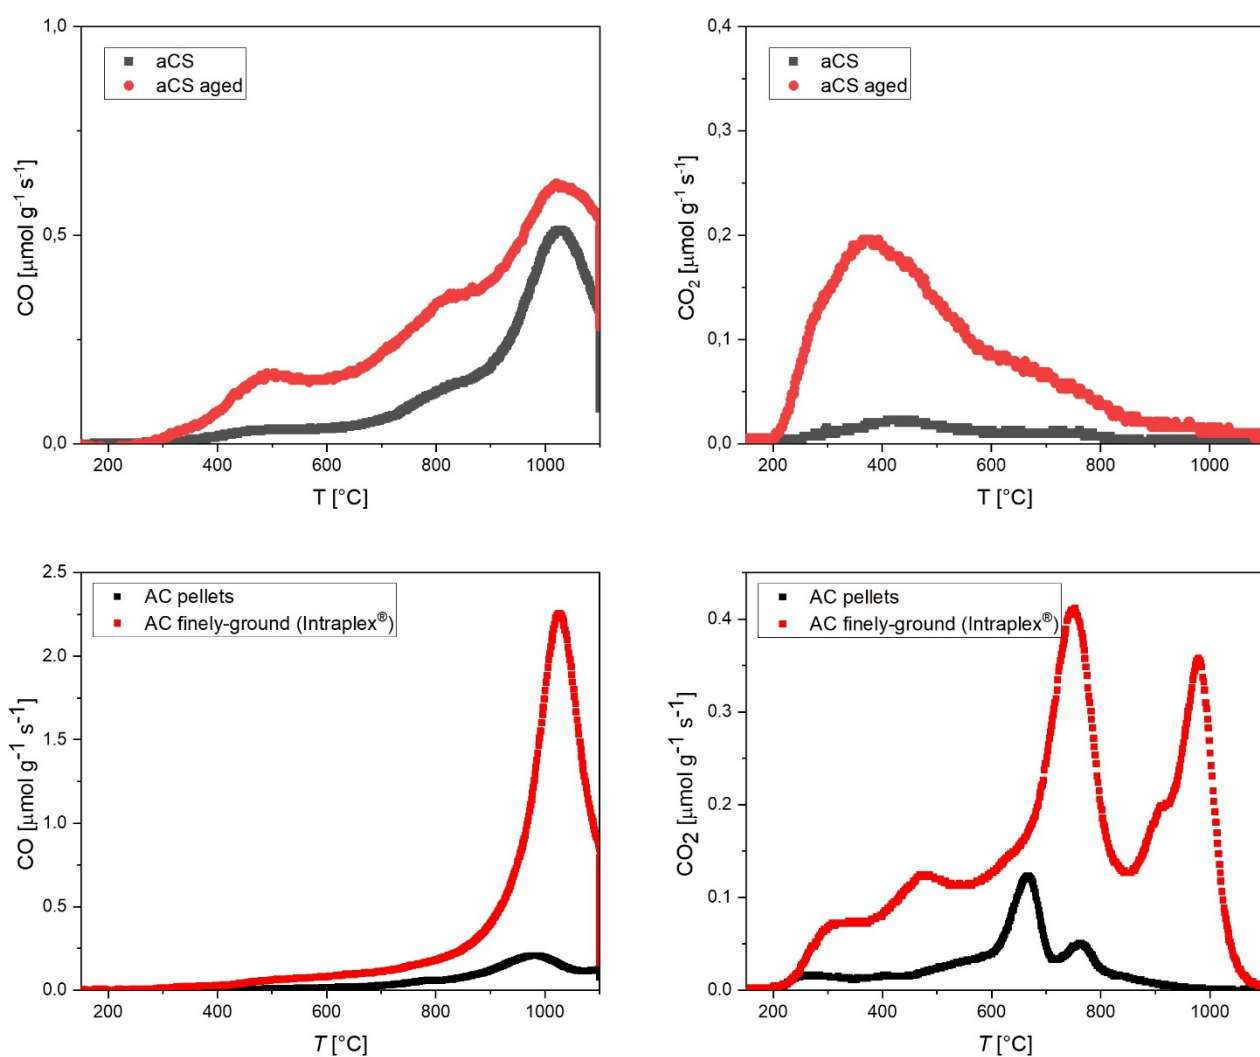

**Figure S1.** Temperature-programmed decomposition (TPD) up to 1100 °C (10 K min<sup>-1</sup>) of activated carbon spheres (aCS) compared with aCS aged (top) and a commercial activated carbon (AC) sample Intraplex® obtained by a wet-milling process (“AC finely-ground”) compared with the respective precursor material in pellet-form (“AC pellets”)

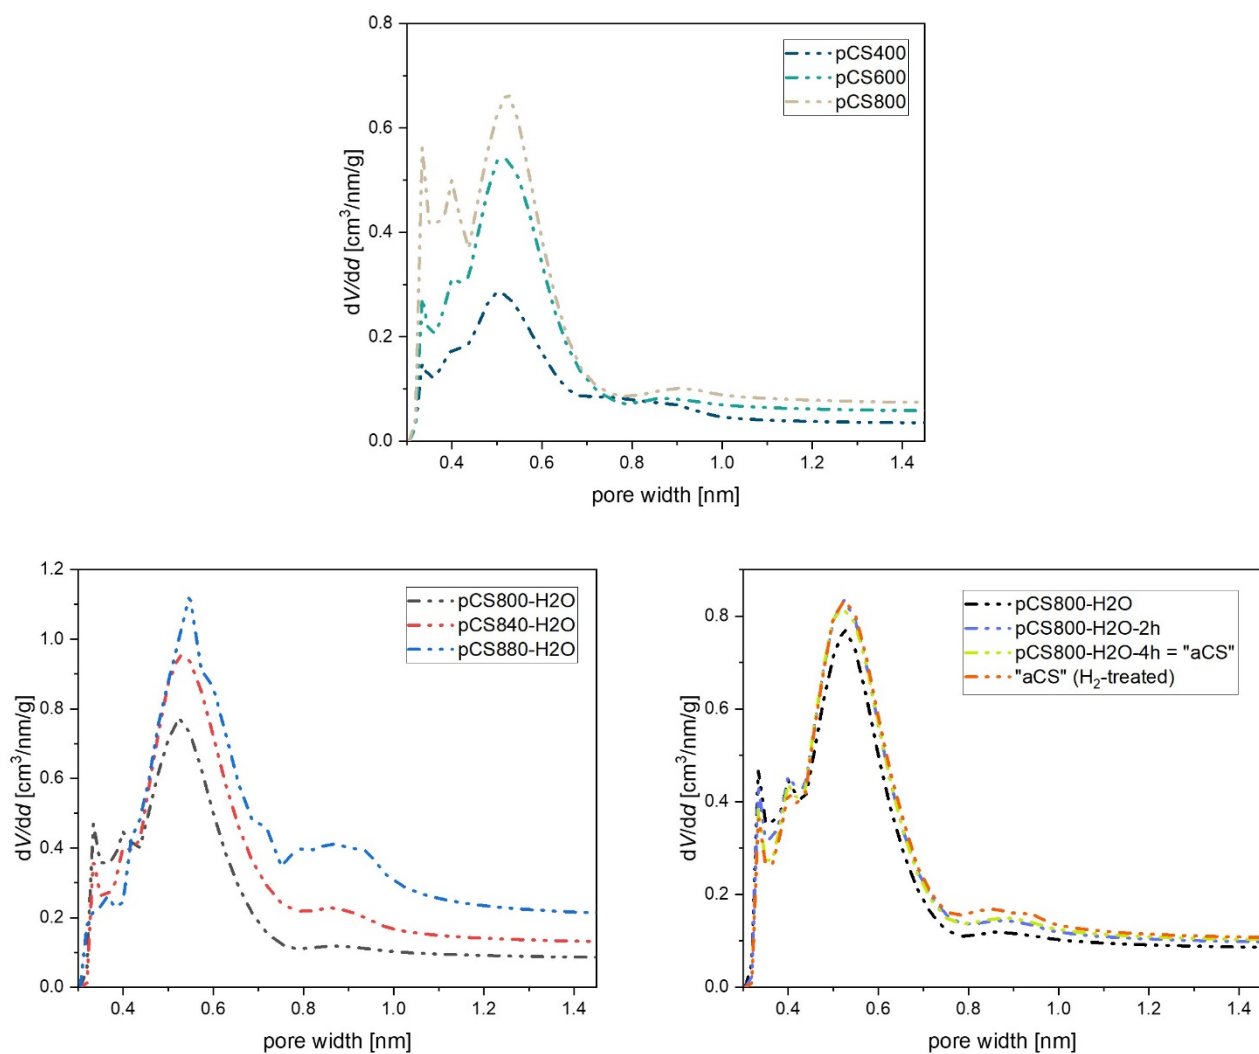

**Figure S2.** Pore size distributions for all pyrolyzed and activated CS samples determined with NLDFT based on CO<sub>2</sub> ad- and desorption (isotherms measured up to  $p/p_0 = 0.0287$  equals to  $p = 0.1$  MPa).

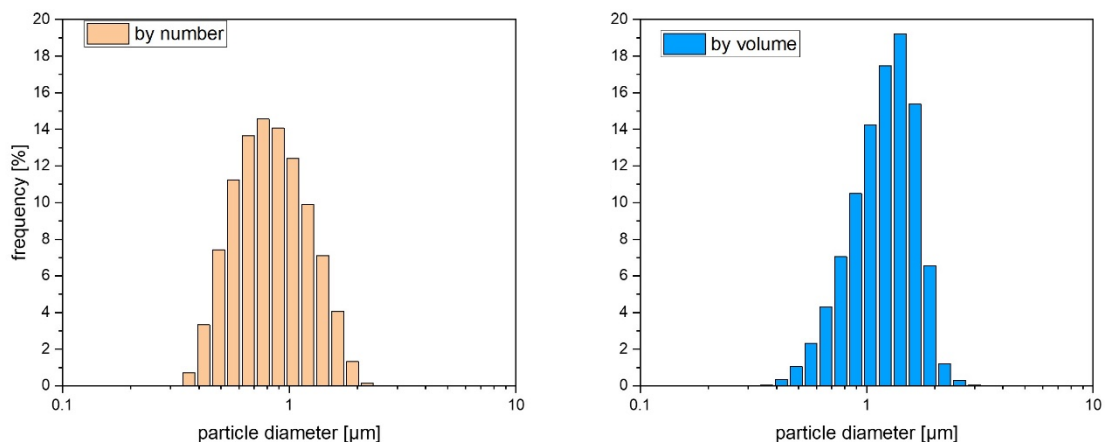

**Figure S3.** Differential particle size distribution by number and by volume determined *via* dynamic light scattering (DLS) analysis of 5 mg L<sup>-1</sup> aCS particles dispersed in 10 mM KNO<sub>3</sub> solution at pH = 6.

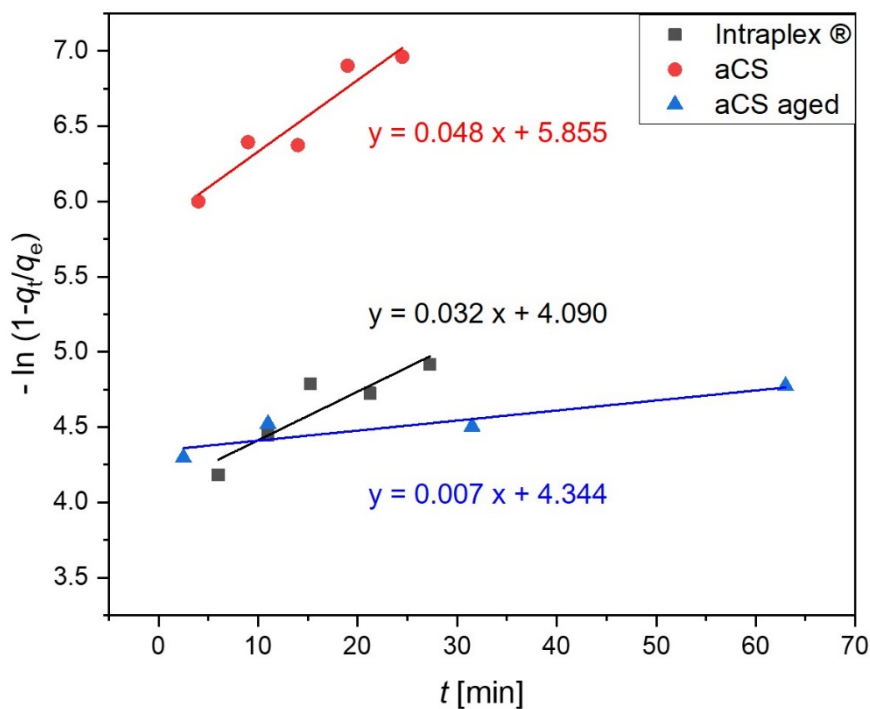

**Figure S4.** Linear fitting of the kinetic data of the monochlorobenzene (MCB) adsorption according to Equation 5 for estimation of the late stage adsorption rates of MCB on the different activated carbon samples.

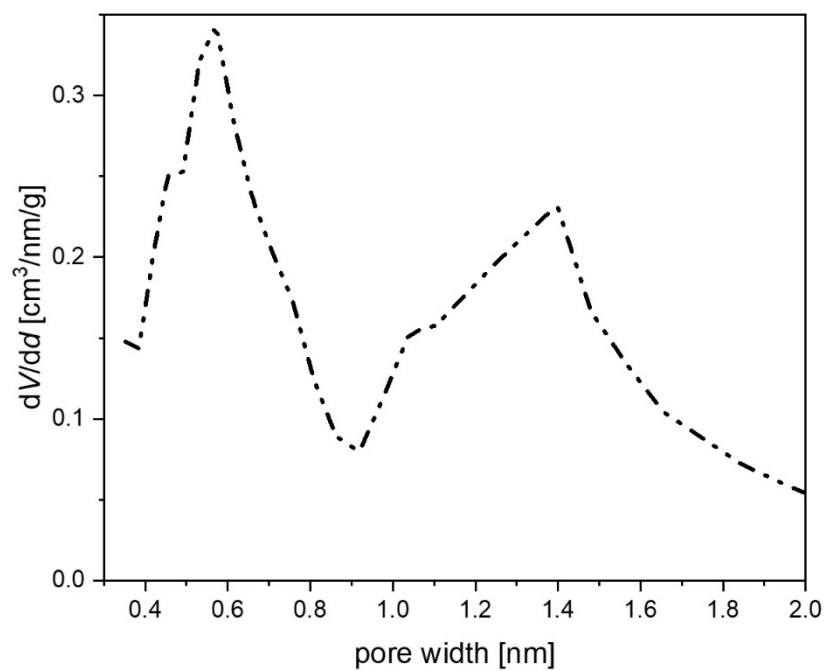

**Figure S5.** Pore size distribution of the AC Intraplex® determined with NLDFT based on CO<sub>2</sub> adsorption (up to  $p/p_0 = 1$ , with  $p_0 = 3.4851$  MPa).
